# Supplementary material for: Association Between Atrial Fibrillation and Occupational Exposure in Firefighters Based on Self‐Reported Survey Data
Source: PubMed Central journal article supplement — J Am Heart Assoc. 2022 Mar 23;11(7):e022543. doi: 10.1161/JAHA.121.022543 (PMC9075462; doi:10.1161/jaha.121.022543), 2022-03-23
Supplement: JAH3-11-e022543-s001.pdf [file JAH3-11-e022543-s001.pdf]

# **SUPPLEMENTAL MATERIAL**

**Table S1. Demographics, occupational characteristics, and risk factors of firefighters.**

|                                     |                       | <b>*Prevalence (%)</b> |
|-------------------------------------|-----------------------|------------------------|
| <b>Demographic Characteristics</b>  |                       |                        |
| Sex                                 | Male                  | 10146/10850 (93.5)     |
|                                     | Female                | 704/10850 (6.5)        |
| Age                                 | ≥ 61 Years            | 486/10860 (4.5)        |
|                                     | ≤ 60 Years            | 10374/10860 (95.5)     |
| Race                                | <sup>†</sup> White    | 10014/10859 (92.2)     |
|                                     | <sup>‡</sup> Black    | 269/10859 (2.5)        |
|                                     | <sup>§</sup> Asian    | 576/10859 (5.3)        |
| Ethnicity                           | Hispanic              | 694/10858 (6.4)        |
| <b>Occupational Characteristics</b> |                       |                        |
| History of Military Service         |                       | 1668/10859 (15.4)      |
| Level of Service                    | Federal               | 133/10860 (1.2)        |
|                                     | State                 | 357/10860 (3.3)        |
|                                     | County                | 1972/10860 (18.2)      |
|                                     | Local                 | 8398/10860 (77.3)      |
| Fires Fought/Year                   | 0-5                   | 1934/10860 (17.8)      |
|                                     | 6-10                  | 3365/10860 (31)        |
|                                     | 11-20                 | 2914/10860 (26.8)      |
|                                     | 21-30                 | 1196/10860 (11)        |
|                                     | 31 or more            | 1451/10860 (13.4)      |
| Type of Firefighter                 | Career                | 9666/10860 (89)        |
|                                     | Volunteer             | 787/10860 (7.2)        |
|                                     | Paid-on-call/per-call | 301/10860 (2.8)        |
|                                     | Other                 | 106/10860 (1)          |
| Occupational Medical Evaluation     |                       | 8170/10860 (75.2)      |
| <b>Risk Factors</b>                 |                       |                        |
| Atrial Fibrillation                 |                       | 298/10792 (2.7)        |
| Cancer                              |                       | 891/10788 (8.3)        |

|                                       |                   |
|---------------------------------------|-------------------|
| Carotid Artery Disease                | 35/10848 (0.3)    |
| Chronic Obstructive Pulmonary Disease | 94/10840 (0.9)    |
| Congestive Heart Failure              | 50/10851 (0.5)    |
| Coronary Artery Disease               | 456/10819 (4.2)   |
| Diabetes Mellitus                     | 470/10837 (4.3)   |
| Hypertension                          | 2551/10796 (23.6) |
| Myocardial Infarction                 | 189/10844 (1.7)   |
| Obstructive Sleep Apnea               | 1660/10684 (15.5) |
| Open Heart Surgery                    | 102/10858 (0.9)   |
| Peripheral Artery Disease             | 58/10834 (0.5)    |
| Stroke/Transient Ischemic Attack      | 83/10848 (0.8)    |
| Valvular Disease                      | 288/10803 (2.7)   |

---

\*Denominator (sample number) varies due to exclusion of respondents answering "not sure" or electing to not answer

†Race includes White/Caucasian/American Indian/Alaskan Native

‡Race includes Black/African American

§Race includes Asian/Native Hawaiian/Pacific Islander/Other

**Table S2. Prevalence of atrial fibrillation in firefighters based on characteristics (n = 10860).**

|                                     |                       | *Prevalence of AF (%) | †p-value |
|-------------------------------------|-----------------------|-----------------------|----------|
| <b>Demographic Characteristics</b>  |                       |                       |          |
| Sex                                 | Male                  | 292/10146 (2.9)       | 0.005    |
|                                     | Female                | 6/704 (0.9)           |          |
| Age                                 | ≥ 61 Years            | 40/486 (8.2)          | <0.001   |
|                                     | ≤ 60 Years            | 258/10374 (2.5)       |          |
| Race                                | <sup>‡</sup> White    | 284/10014 (2.8)       | 0.103    |
|                                     | <sup>§</sup> Black    | 6/269 (2.2)           |          |
|                                     | <sup>l</sup> Asian    | 8/576 (1.4)           |          |
| Ethnicity                           | Hispanic              | 12/694 (1.7)          | 0.0931   |
|                                     | Non-Hispanic          | 286/10164 (2.8)       |          |
| <b>Occupational Characteristics</b> |                       |                       |          |
| History of Military Service         | Present               | 47/1668 (2.8)         | 0.8073   |
|                                     | Absent                | 251/9191 (2.7)        |          |
| Level of Service                    | Federal               | 6/133 (4.5)           | 0.574    |
|                                     | State                 | 8/357 (2.2)           |          |
|                                     | County                | 52/1972 (2.6)         |          |
|                                     | Local                 | 232/8398 (2.8)        |          |
| Fires Fought/Year                   | 0-5                   | 39/1934 (2)           | <0.001   |
|                                     | 6-10                  | 77/3365 (2.3)         |          |
|                                     | 11-20                 | 80/2914 (2.7)         |          |
|                                     | 21-30                 | 36/1196 (3)           |          |
|                                     | 31 or more            | 66/1451 (4.5)         |          |
| Type of Firefighter                 | Career                | 253/9666 (2.6)        | 0.106    |
|                                     | Volunteer             | 32/787 (4.1)          |          |
|                                     | Paid-on-call/per-call | 10/301 (3.3)          |          |
|                                     | Other                 | 3/106 (2.8)           |          |
| Occupational Medical Evaluation     | Present               | 221/8170 (2.7)        | 0.683    |
|                                     | Absent                | 77/2690 (2.9)         |          |
| <b>Social Characteristics</b>       |                       |                       |          |

|                               |                  |                |        |
|-------------------------------|------------------|----------------|--------|
| History of Alcohol Use        | Present          | 209/8622 (2.4) | <0.001 |
|                               | Absent           | 89/2238 (4)    |        |
| History of Smoking            | Present, current | 7/200 (3.5)    | 0.759  |
|                               | Absent, quit     | 58/2042 (2.8)  |        |
|                               | Absent, never    | 233/8618 (2.7) |        |
| Secondhand Smoke Exposure     | Present          | 144/4105 (3.5) | <0.001 |
|                               | Absent           | 154/6755 (2.3) |        |
| History of Hospital Admission | Present          | 248/5368 (4.6) | <0.001 |
|                               | Absent           | 50/5492 (0.9)  |        |

---

\*Denominator (sample number) varies due to exclusion of respondents answering "not sure" or electing to not answer

†Chi-squared test,  $p < 0.05$  is considered significant

‡Race includes White/Caucasian/American Indian/Alaskan Native

§Race includes Black/African American

¶Race includes Asian/Native Hawaiian/Pacific Islander/Other
